# Supplementary material for: Multifaceted insight into the cation-disordered self-activated luminescence of Zn3V2O8 compositions for lighting and pigment applications
Source: Royal Society of Chemistry journal article supplement (doi:10.1039/d3tc04503j), 2024-01-01
Supplement: d3tc04503j1.pdf [file d3tc04503j1.pdf]

**Supplementary material**

**Multifaceted Insight into the Cation-Disordered Self-Activated  
Luminescence of  $\text{Zn}_3\text{V}_2\text{O}_8$  Compositions for  
Lighting and Pigment Applications**

**S. Shisina,<sup>a, c</sup> P. K. Thejus,<sup>b, c</sup> K. G. Nishanth,<sup>b, c, \*</sup> Subrata Das<sup>a, c, \*</sup>**

<sup>a</sup> Materials Science and Technology Division, CSIR – National Institute for Interdisciplinary  
Science and Technology, Thiruvananthapuram, Kerala-695019, India

<sup>b</sup> Centre for Sustainable Energy Technologies (C-SET), CSIR – National Institute for  
Interdisciplinary Science and Technology, Thiruvananthapuram, Kerala-695019, India

<sup>c</sup> Academy of Scientific and Innovative Research (AcSIR), Ghaziabad, Uttar Pradesh-  
201002, India

\*E-mail: [subratadas@niist.res.in](mailto:subratadas@niist.res.in) (SD), [nishanthkg@niist.res.in](mailto:nishanthkg@niist.res.in) (KGN)

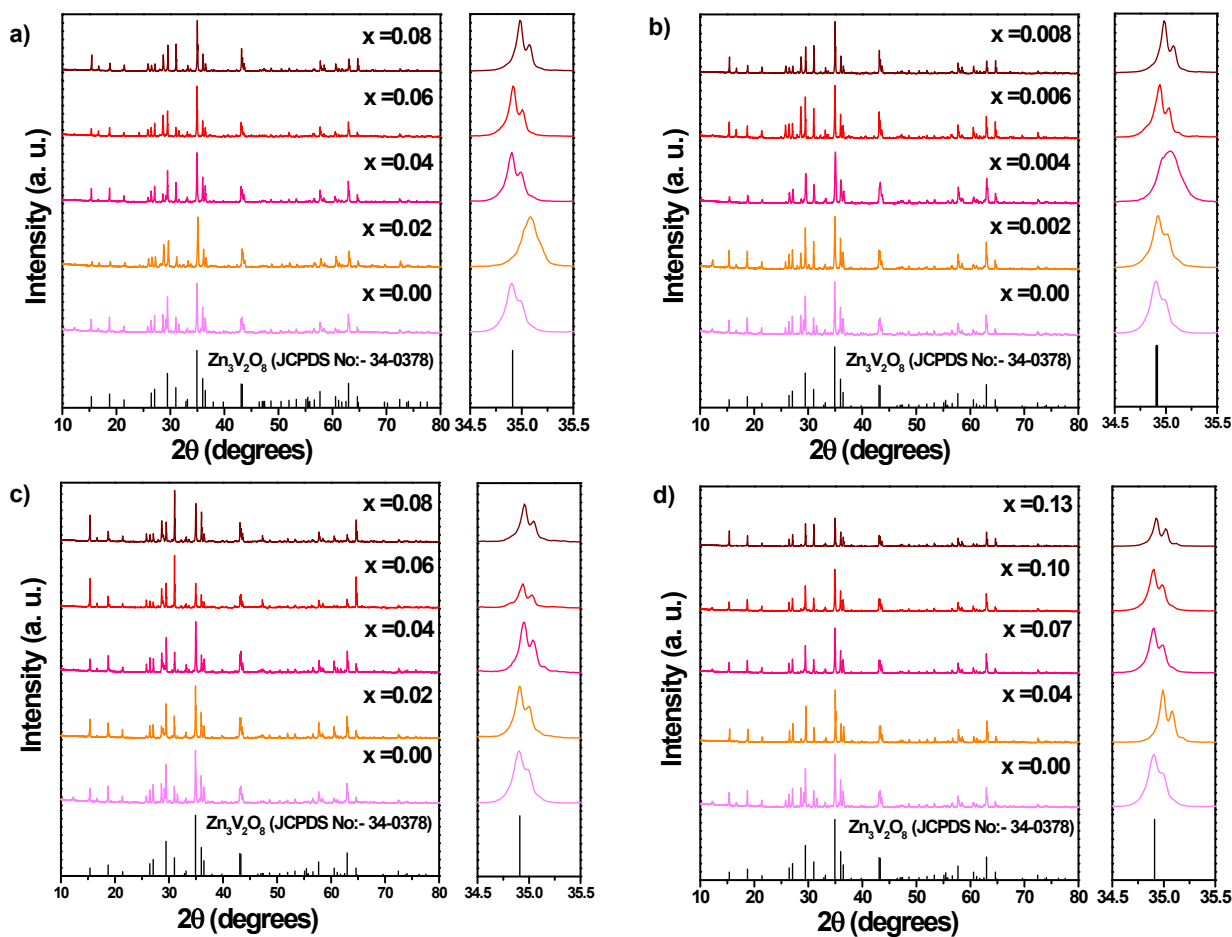

**Fig. S1.** XRD patterns of series of (a)  $\text{Zn}_{3-x}\text{In}_x\text{V}_2\text{O}_8$  ( $0.02 \leq x \leq 0.08$ ), (b)  $\text{Zn}_{3-x}\text{Y}_x\text{V}_2\text{O}_8$  ( $0.002 \leq x \leq 0.008$ ), (c)  $\text{Zn}_{3-x}\text{Bi}_x\text{V}_2\text{O}_8$  ( $0.02 \leq x \leq 0.08$ ), (d)  $\text{Zn}_{3-x}\text{K}_x\text{V}_2\text{O}_8$  ( $0.04 \leq x \leq 0.13$ ) phosphors.

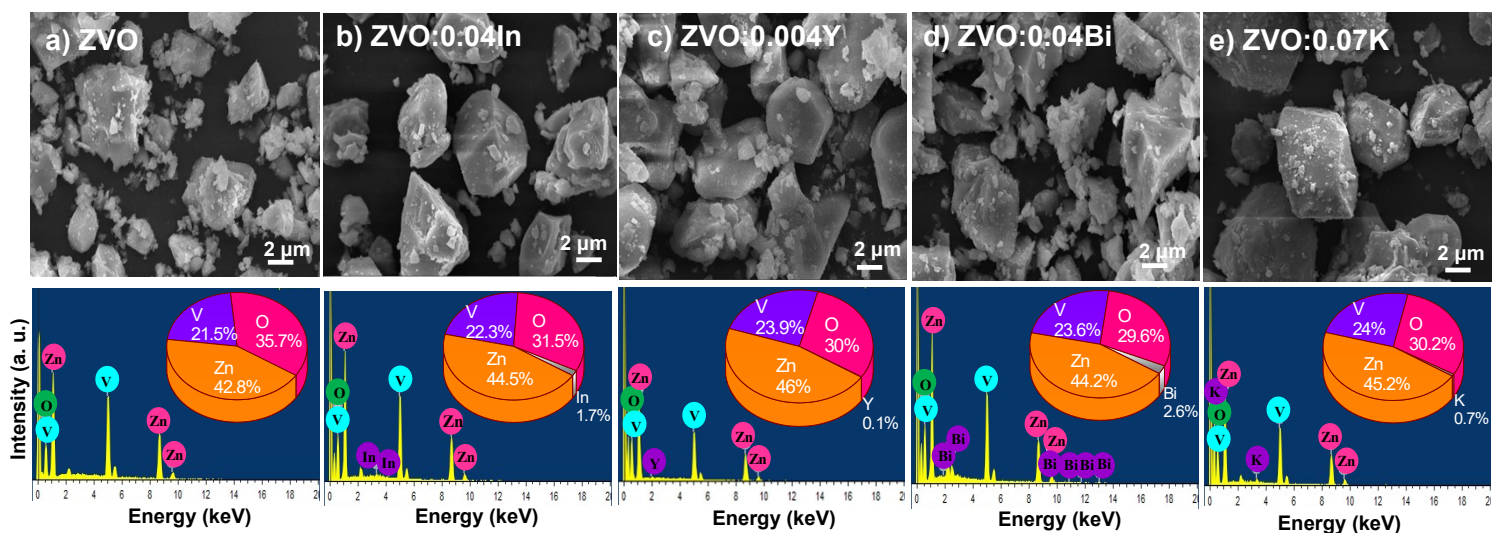

**Fig. S2.** SEM micrographs and EDX spectra for (a) ZVO, (b) ZVO: 0.04In, (c) ZVO: 0.004Y, (d) ZVO: 0.04Bi, (e) ZVO: 0.07K phosphors with corresponding elemental wt. % distribution in the insets.

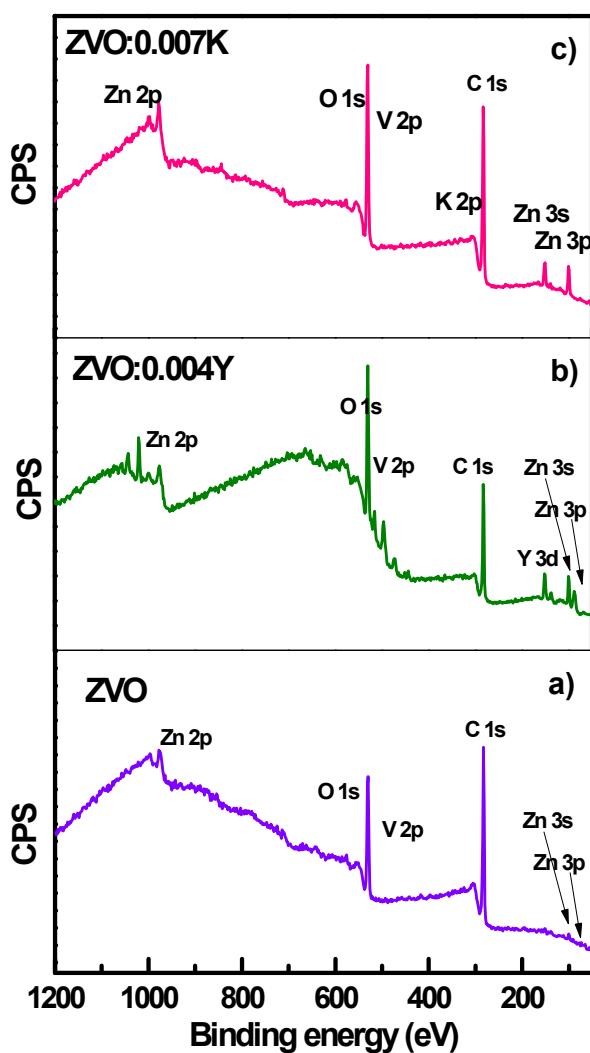

**Fig. S3.** XPS survey spectra of (a) ZVO, (b) ZVO: 0.004Y, (c) ZVO: 0.07K phosphors.

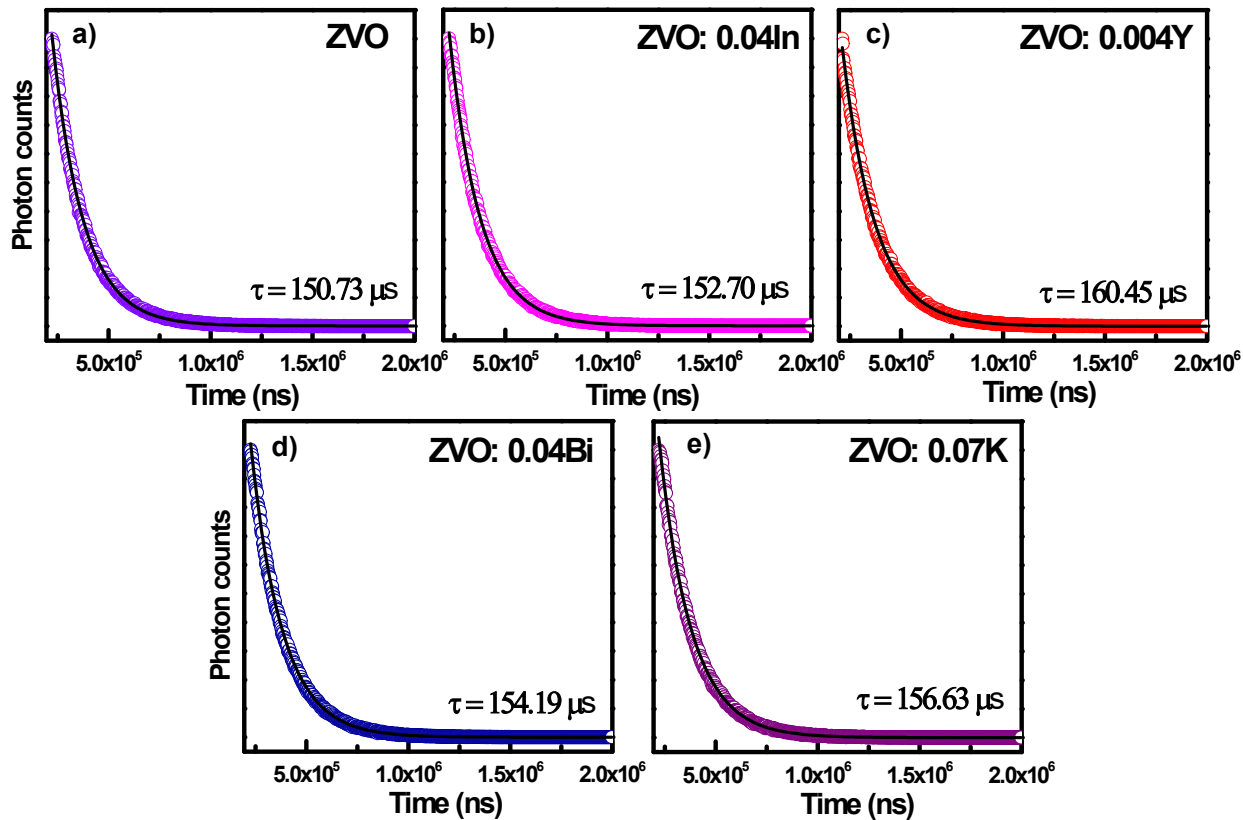

**Fig. S4.** PL decay curves of (a) ZVO, (b) ZVO: 0.04In, (c) ZVO: 0.004Y, (d) ZVO: 0.04Bi, (e) ZVO: 0.07K phosphors recorded upon 360 nm excitation and 550 nm emission.

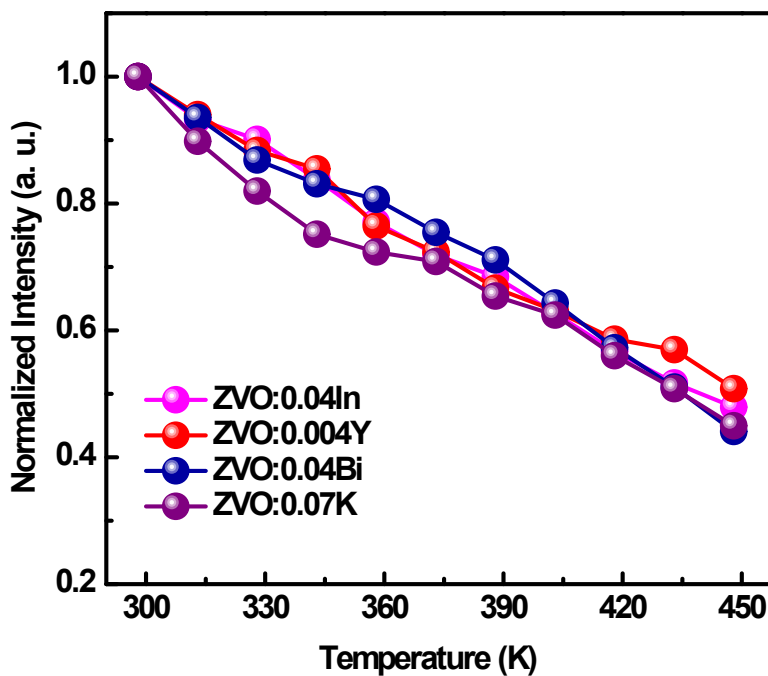

**Fig. S5.** Normalized PL emission intensity vs temperature plot of ZVO, ZVO: 0.04In, ZVO: 0.004Y, ZVO: 0.04Bi, ZVO: 0.07K phosphors.

**Table S1.** Refined atomic coordinates of (a) ZVO, (b) ZVO: 0.04In, (c) ZVO: 0.004Y, (d) ZVO: 0.04Bi, (e) ZVO: 0.07K phosphors from the refinement data.

| Sample             | Atom | Site | x       | y       | z       | Occupancy |
|--------------------|------|------|---------|---------|---------|-----------|
| <b>ZVO</b>         | Zn1  | 4a   | 0       | 0       | 0       | 1         |
|                    | Zn2  | 8e   | 0.25    | 0.1361  | 0.25    | 1         |
|                    | V    | 8f   | 0       | 0.3784  | 0.1204  | 1         |
|                    | O1   | 8f   | 0       | 0.2479  | 0.2343  | 1         |
|                    | O2   | 8f   | 0       | 0.9993  | 0.2405  | 1         |
|                    | O3   | 16g  | 0.226   | 0.3827  | 0.0047  | 1         |
| <b>ZVO: 0.04In</b> | Zn1  | 4a   | 0       | 0       | 0       | 0.9867    |
|                    | In1  | 4a   | 0       | 0       | 0       | 0.0134    |
|                    | Zn2  | 8e   | 0.25    | 0.13523 | 0.25    | 1         |
|                    | V    | 8f   | 0       | 0.37801 | 0.12464 | 1         |
|                    | O1   | 8f   | 0       | 0.25125 | 0.22774 | 1         |
|                    | O2   | 8f   | 0       | 0.99681 | 0.2405  | 1         |
|                    | O3   | 16g  | 0.22342 | 0.38111 | 0.0067  | 1         |
| <b>ZVO: 0.004Y</b> | Zn1  | 4a   | 0       | 0       | 0       | 0.9987    |
|                    | Y1   | 4a   | 0       | 0       | 0       | 0.0013    |
|                    | Zn2  | 8e   | 0.25    | 0.13718 | 0.25    | 1         |
|                    | V    | 8f   | 0       | 0.37635 | 0.12526 | 1         |
|                    | O1   | 8f   | 0       | 0.25980 | 0.23167 | 1         |
|                    | O2   | 8f   | 0       | 0.99410 | 0.2405  | 1         |
|                    | O3   | 16g  | 0.21418 | 0.37709 | 0.00789 | 1         |
| <b>ZVO: 0.04Bi</b> | Zn1  | 4a   | 0       | 0       | 0       | 0.9867    |
|                    | Bi1  | 4a   | 0       | 0       | 0       | 0.0134    |
|                    | Zn2  | 8e   | 0.25    | 0.13639 | 0.25    | 1         |
|                    | V    | 8f   | 0       | 0.38072 | 0.12687 | 1         |
|                    | O1   | 8f   | 0       | 0.25366 | 0.23758 | 1         |
|                    | O2   | 8f   | 0       | 0.99751 | 0.2410  | 1         |
|                    | O3   | 16g  | 0.21782 | 0.38247 | 0.0080  | 1         |
| <b>ZVO: 0.07K</b>  | Zn1  | 4a   | 0       | 0       | 0       | 0.9767    |
|                    | K1   | 4a   | 0       | 0       | 0       | 0.0234    |
|                    | Zn2  | 8e   | 0.25    | 0.13551 | 0.25    | 1         |
|                    | V    | 8f   | 0       | 0.37768 | 0.12412 | 1         |
|                    | O1   | 8f   | 0       | 0.25337 | 0.22809 | 1         |
|                    | O2   | 8f   | 0       | 0.99835 | 0.24406 | 1         |
|                    | O3   | 16g  | 0.21969 | 0.38033 | 0.00490 | 1         |
